# Supplementary material for: The Effect of Elevated Protein Intake on DNA Damage in Older People: Comparative Secondary Analysis of Two Randomized Controlled Trials
Source: MDPI journal article supplement (doi:10.3390/nu13103479), 2021-09-30
Supplement: s1 [file s1]

## Supplementary Materials

**Supplementary Table S1.** Correlations of DNA damage markers with plasma lipid parameters at baseline in males and females from the Austrian study.

|                           | Females              |                    |                    | Males                |                    |                    |
|---------------------------|----------------------|--------------------|--------------------|----------------------|--------------------|--------------------|
|                           | Lysis [%DNA in tail] | H2O2 %DNA in tail] | FPG [%DNA in tail] | Lysis [%DNA in tail] | H2O2 %DNA in tail] | FPG [%DNA in tail] |
| Total-cholesterol [mg/dl] | <b>0.590**</b>       | <b>0.284*</b>      | <b>0.429**</b>     | <b>0.311*</b>        | 0.123              | <b>0.356**</b>     |
| HDL-cholesterol [mg/dl]   | <b>-0.330**</b>      | <b>-0.332**</b>    | -0.185             | <b>-0.256*</b>       | -0.143             | 0.128              |
| LDL-cholesterol [mg/dl]   | <b>0.544**</b>       | <b>0.296*</b>      | <b>0.389**</b>     | <b>0.316*</b>        | 0.147              | <b>0.348**</b>     |
| Triglyceride [mg/dl]      | <b>0.688**</b>       | <b>0.484**</b>     | <b>0.442**</b>     | <b>0.499**</b>       | 0.201              | 0.044              |
| TG/HDL [-]                | <b>0.672**</b>       | <b>0.473**</b>     | <b>0.393**</b>     | <b>0.498**</b>       | 0.232              | 0.163              |
| Chol/HDL [-]              | <b>0.688**</b>       | <b>0.503**</b>     | <b>0.411**</b>     | <b>0.478**</b>       | 0.189              | -0.064             |

\* p<0.05, \*\* p<0.01

**Supplementary Table S2.** Impact of the protein intervention on DNA damage markers in females from the Austrian study.

| Parameter                                        | Group | Mean ± stdv |              | time              | group   | time x group | Time points differences |
|--------------------------------------------------|-------|-------------|--------------|-------------------|---------|--------------|-------------------------|
|                                                  |       | Baseline    | 6 weeks      | p-value           | p-value | p-value      | Δ (post – pre)          |
| <b>Lysis [%DNA in tail]</b>                      | CON   | 4.05±2.14   | 3.28±1.43*   |                   |         |              | -0.77±1.41              |
|                                                  | RP    | 3.70±1.17   | 3.59±1.39    | <b>0.011</b>      | 0.451   | 0.294        | -0.11±1.65              |
|                                                  | HP    | 3.47±0.93   | 3.02±0.86*   |                   |         |              | -0.47±0.86              |
| <b>H<sub>2</sub>O<sub>2</sub> [%DNA in tail]</b> | CON   | 11.33±2.74  | 9.60±2.21*** |                   |         |              | -1.74±1.48              |
|                                                  | RP    | 10.04±1.99  | 9.07±2.19    | <b>&lt; 0.001</b> | 0.319   | 0.396        | -0.97±2.22              |
|                                                  | HP    | 10.91±1.75  | 9.67±2.16**  |                   |         |              | -1.44±1.58              |
| <b>FPG [%DNA in tail]</b>                        | CON   | 7.35±2.08   | 6.56±1.48*   |                   |         |              | -0.79±1.44              |
|                                                  | RP    | 7.50±1.63   | 6.25±1.63**  | <b>&lt; 0.001</b> | 0.862   | 0.608        | -1.26±1.80              |
|                                                  | HP    | 7.32±1.75   | 6.10±1.80**  |                   |         |              | -1.11±1.79              |
| <b>GSH [μmol/l]</b>                              | CON   | 15.08±3.35  | 14.81±2.07   |                   |         |              | -0.27±3.19              |
|                                                  | RP    | 17.62±3.74  | 15.82±3.34*  | <b>0.028</b>      | 0.101   | 0.196        | -1.79±2.86              |
|                                                  | HP    | 16.33±3.32  | 15.94±1.95   |                   |         |              | -0.39±2.49              |
| <b>GSSG [μmol/l]</b>                             | CON   | 8.06±1.44   | 7.78±1.69    |                   |         |              | -0.28±1.77              |
|                                                  | RP    | 8.12±1.49   | 7.56±1.68*   | 0.131             | 0.651   | 0.545        | -0.56±1.09              |
|                                                  | HP    | 8.20±1.32   | 8.17±1.10    |                   |         |              | -0.04±1.48              |
| <b>GSH:GSSG ratio</b>                            | CON   | 1.88±0.30   | 1.97±0.42    |                   |         |              | 0.09±0.38               |
|                                                  | RP    | 2.17±0.27   | 2.15±0.47    | 0.839             | 0.061   | 0.428        | -0.03±0.41              |
|                                                  | HP    | 2.02±0.38   | 1.98±0.28    |                   |         |              | -0.04±0.29              |
| <b>CRP [mg/l]</b>                                | CON   | 1.74±1.88   | 3.60±9.23    |                   |         |              | 1.86±9.18               |
|                                                  | RP    | 2.63±2.03   | 3.08±2.79    | 0.314             | 0.919   | 0.496        | 0.46±2.38               |
|                                                  | HP    | 2.50±2.60   | 2.36±1.96    |                   |         |              | -0.13±1.72              |

Values are shown as mean±stdv. p-Values refer to main effects of time, group and time\*group interactions (two-way mixed ANOVA). Significant effects are shown in bold. In case of significant overall time effects, Bonferroni-corrected post hoc analyses were performed individually for groups, whereby asterisks indicate

significant differences to pre (t1). \*\*\* (p<0.001); \*\* (p<0.01); \* (p<0.05). CON (control group = observation only); RP (recommended protein group); HP (high protein group).

**Supplementary Table S3.** Impact of the protein intervention on DNA damage marker in males from the Austrian study.

| Parameter                                        | Group | Mean ± stdv |              | time         | group   | time x group | Time points differences |
|--------------------------------------------------|-------|-------------|--------------|--------------|---------|--------------|-------------------------|
|                                                  |       | Baseline    | 6 weeks      | p-value      | p-value | p-value      | Δ (post – pre)          |
| <b>Lysis [%DNA in tail]</b>                      | CON   | 3.37±1.01   | 3.28±0.87    |              |         |              | -0.12±0.91              |
|                                                  | RP    | 3.59±0.78   | 3.49±1.28    | 0.066        | 0.746   | 0.222        | -0.09±1.39              |
|                                                  | HP    | 3.66±1.42   | 3.04±0.85**  |              |         |              | -0.61±0.81              |
| <b>H<sub>2</sub>O<sub>2</sub> [%DNA in tail]</b> | CON   | 10.44±1.75  | 9.79±1.93    |              |         |              | -0.69±2.10              |
|                                                  | RP    | 9.97±1.84   | 9.80±1.55    | <b>0.003</b> | 0.825   | 0.109        | -0.16±1.59              |
|                                                  | HP    | 10.51±2.33  | 9.09±1.65**  |              |         |              | -1.42±1.71              |
| <b>FPG [%DNA in tail]</b>                        | CON   | 7.09±1.43   | 6.07±1.55**  |              |         |              | -0.94±1.50              |
|                                                  | RP    | 7.14±1.36   | 7.35±2.06    | <b>0.001</b> | 0.431   | <b>0.006</b> | 0.21±1.64               |
|                                                  | HP    | 7.59±2.16   | 6.27±1.48*** |              |         |              | -1.32±1.20              |
| <b>GSH [μmol/l]</b>                              | CON   | 17.01±3.91  | 16.47±3.09   |              |         |              | -0.55±2.63              |
|                                                  | RP    | 17.06±3.73  | 16.37±2.48   | <b>0.027</b> | 0.990   | 0.723        | -0.69±2.84              |
|                                                  | HP    | 17.20±4.58  | 15.99±2.79   |              |         |              | -1.22±2.60              |
| <b>GSSG [μmol/l]</b>                             | CON   | 8.43±1.53   | 8.63±1.01    |              |         |              | 0.19±1.39               |
|                                                  | RP    | 8.69±1.17   | 8.85±0.94    | 0.686        | 0.760   | 0.139        | 0.17±1.39               |
|                                                  | HP    | 8.86±1.55   | 8.28±1.10    |              |         |              | -0.58±1.20              |
| <b>GSH:GSSG ratio</b>                            | CON   | 2.03±0.37   | 1.91±0.31    |              |         |              | -0.11±0.47              |
|                                                  | RP    | 1.96±0.31   | 1.85±0.23    | 0.080        | 0.792   | 0.639        | -0.11±0.23              |
|                                                  | HP    | 1.96±0.42   | 1.94±0.29    |              |         |              | -0.02±0.28              |
| <b>CRP [mg/l]</b>                                | CON   | 1.17±0.71   | 1.49±0.74*   |              |         |              | 0.32±0.61               |
|                                                  | RP    | 3.61±4.11   | 2.43±2.56    | 0.421        | 0.185   | 0.063        | -1.18±3.95              |
|                                                  | HP    | 1.53±1.85   | 3.81±7.20    |              |         |              | 2.28±6.41               |

Values are shown as mean±stdv. p-Values refer to main effects of time, group and time\*group interactions (two-way mixed ANOVA). Significant effects are shown in bold. In case of significant overall time effects, Bonferroni-corrected post hoc analyses were performed individually for groups, whereby asterisks indicate significant differences to pre (t1). \*\*\* (p<0.001); \*\* (p<0.01); \* (p<0.05). CON (control group = observation only); RP (recommended protein group); HP (high protein group).
